# Supplementary material
Source: publisher figshare collection journal article supplement (https://rs.figshare.com/ndownloader/files/13724090)
Supplement: Supplementary file 1 [file 13724090]

**CHARLES WALTER SUCKLING**

**Bibliography**

**Charles Walter Suckling CBE (1989), FRS (1978), BSc, PhD, DSc (Hon. Liverpool), DUniv (Hon. Stirling), C.Chem, FRSC, Senior Fellow Royal College of Art.**

Born 24 July 1920 at Teddington, Middlesex UK, eldest son of Ernest Edward and Barbara Suckling (née Thomson).

|            |                                                                                                                                |
|------------|--------------------------------------------------------------------------------------------------------------------------------|
| Married    | 25 May 1946 (Eleanor) Margaret Watterson                                                                                       |
| Sons       | Colin James, born 24 March 1947<br>Keith Edward, born 25 March 1947                                                            |
| Daughter   | Karen Anne, born 10 March 1952                                                                                                 |
| Schools    | Lilliput Primary, Hampshire<br>Granby Street Primary, Liverpool<br>Somerville Primary, Wallasey<br>Oldershaw Grammar, Wallasey |
| University | Liverpool, BSc 1942, PhD 1948                                                                                                  |

#### Employment

ICI 1942-1982  
Research Director Mond Division 1966-69  
Deputy Chairman Mond Division 1969-72  
Chairman Paints Division 1972-1977  
General Manager Research & Technology for the ICI Group 1977-1982  
Sometime Director of ICI subsidiaries in Finland, France, Germany and Portugal.

Albright & Wilson Ltd - Non-Executive Director 1981-91

Bradbury, Suckling & Partners Ltd, Consultants in Science, Technology & Innovation - Director 1969-93, Chairman 1982-93 when the Company closed down.

Consultant to *inter alia*: U.K. Government, PARIBAS, Banque de Paris et des Pays Bas (Cortexa International), Chloride Silent Power Ltd, Chloride Group plc, Electricity Council, ICI plc, Tenneco Inc, Transgene (Genetic Engineering, France), Cowiconsult (Civil Engineering, Denmark), National Power, National Grid, Woolfson Foundation.

Visiting Professor Stirling University 1968-93

Visiting Professor University of East Anglia 1977-83

Visiting Fellow Department of Management Research, Royal College of Art 1980-84

Visiting Lecturer UMIST Department of Chemical Engineering, Integrated Pollution Management Course 1991-93

Member of Council, University of Liverpool 1969-72

Chairman Advisory Committee for the Research and Development Advisory Service (RDAS) Liverpool University 1981-84

Member of Steering Committee, Royal Society Working Parties on Risk Assessment 1978-82 and 1990-1992

Member British Broadcasting Corporation Science Consultative Group 1979-85

Member British National Committee for Chemistry (IUPAC affairs) 1980-83

Member SERC Science Board, SERC/SSRC Joint Committee 1980s

Member, Biological Sciences Sub-Committee of the University Grants Committee 1980-85

Member Royal Institution Council 1988-92

Member, Council Royal College of Art London 1981-90, Treasurer and Vice Chairman of Council 1984-90.

Member Royal Commission on Environmental Pollution 1982-92

Member Electricity Supply Research Council 1982 to privatisation

Member Management Committee of the Joint Surface Water Acidification Research Programme (SWAP) of the Royal Society, the Royal Norwegian Academy of Sciences and Letters and the Royal Swedish Academy of Sciences 1983-87

Member ABRC/NERC Committee on the Future of the British Geological Survey (Butler Committee) 1985-87

Chairman of Trustees, Royal College of Art Retirement Benefit Scheme 1987-94

Member Scientific Advisory Committee of the EMF Biological Research Trust and latterly Chairman of Board of Trustees 1988-97

Chairman Scientific Advisory Committee *Science in the Environment* course, York University 1991-2001

Member Royal Society of Chemistry Council and Finance Committee 1986-92, Parliamentary Affairs Committee 1992-95

Chairman Scientific Advisory Committee GERC, Imperial College, 1991-95

Member HEFCE Research Sub-Group of the Joint Performance Indicators Working Group 1992-93

Member MRC Working Group on Approaches for the Improvement of the Collection of Exposure Data 1992-93

Member DES Committee on the Teaching of English (Kingman Committee) 1986-87

Member National Curriculum Working Group for English 1988-89

Member National Curriculum Working Group for Modern Foreign Languages 1989-91

Member Microbiological Risk Assessment Sub-Committee of the Advisory Committee on Dangerous Pathogens 1993-5

Governor, Monk's Walk School, Welwyn Garden City, 1994-97

Planned and chaired the Society of Chemical Industry's Centennial Conference, Cambridge 1981

Liverpool University Chemical Society Medal 1964

John Scott Medal of the City of Philadelphia, for the invention of the anaesthetic Halothane, jointly with Dr. James Raventós 1973

(The John Scott Award - set up in the early 1800's by John Scott, an Edinburgh druggist, is given annually to "the most deserving" men and women whose inventions have contributed in some outstanding way to the "comfort, welfare and happiness" of mankind. Among previous recipients are Mme. Curie, Thomas Edison, Glen Seaborg, Guglielmo Marconi and Alexander Fleming.)

Royal College of Anaesthetists College Medal for distinguished service to anaesthesia 1992, renamed in 1999 the Royal College of Anaesthetists Gold Medal.

Royal College Anaesthetists Joseph Clover Medal 1994

Bicentennial Lecture, Washington College, Chestertown, Maryland, USA 1981

Robbins Lecture, University of Stirling, 1990

Joseph Clover Memorial Lecture, Royal College of Anaesthetists, 1994

## **Publications of Charles Walter Suckling FRS**

Brown, J.H., Suckling, C.W. and Whalley, W.B., 1949. Some fluorinated derivatives of toluene. *Journal of the Chemical Society*, S95-S99.

Robertson, A., Suckling, C.W. and Whalley, W.B., 1949. 336. The chemistry of the "insoluble red" woods. Part III. The structure of santal and a note on orobol. *Journal of the Chemical Society*, 1571-1578.

Bradbury, F.R., Campbell, A., Suckling, C.W., Jameson, H.R. and Peacock, F.C., 1957. The nematocidal properties of azides. *Annals of Applied Biology*, 45(2), 241-250.

Suckling, C.W., 1957. Some chemical and physical factors in the development of fluothane. *British journal of anaesthesia*, 29(10), 466-472.

Suckling, C.W., Raventos, J., Spinks, A. and Johnstone, M., 1958. The development of halothane. *Manchester University Medical School Gazette*, 37, 53.

Suckling, C.W., 1958. Halothane (fluothane)-the chemical approach to non-explosive volatile anaesthetic agents. *Anaesthesia*, 13(2), 194-194.

Suckling, C.W. and Virtue, R.W., 1959. Some chemical and physical factors in the development of fluothane. *Survey of Anesthesiology*, 3(1), 19.

Suckling, C.W. and Raventos, J., 1960. Process for the preparation of I, I, I-trifluoro-2-bromo-2-chloroethane. United States Patent 2921098A

Chapman, J., Hill, R., Muir, J., Suckling, C.W. and Viney, D.J., 1967. Impurities in halothane: their identities, concentrations and determination. *Journal of Pharmacy and Pharmacology*, 19(4), 231-239.

Bradbury, F.R., Rose, L.M. and Suckling, C.W., 1968. Trends in process development. *Chemistry in Britain*, 4(11), 489-499.

Baines, A., Bradbury, F.R. and Suckling, C.W., 1969. Research in the chemical industry; the environment, objectives and strategy. Elsevier, London.

Bradbury, F.R., McCarthy, M.C. and Suckling, C.W., 1972. Patterns of innovation. I. *Chemistry and Industry*, 22-26.

Bradbury, F.R., McCarthy, M.C. and Suckling, C.W., 1972. Patterns of innovation. III. The anaesthetic halothane. *Chemistry and Industry*, 106-110.

Bradbury, F.R., McCarthy, M.C. and Suckling, C.W., 1972. Patterns of innovation. III. The bipyridyl herbicides. *Chemistry and Industry*, 195-200.

Bradbury, F.R., Gallagher, W.M. and Suckling, C.W., 1973. Qualitative aspects of the evaluation and control of research and development projects. *R&D Management*, 3(2), 49-57.

Suckling, C.W., 1978. Challenges to R&D management: Today's problems. *Proceedings of Symposium of The Research and Development Society*, 3-11.

Suckling, C.J., Suckling, K.E. and Suckling, C.W., 1980. *Chemistry through models*. Cambridge University Press, Cambridge.

Suckling, C.W. 1980. Research directions for the 1980s. *Chemistry and Industry*, 5 January, 14-17.

Johnson, A.W., Rose, F.L. and Suckling, C.W., 1984. Alfred Spinks. 25 February 1917-11 February 1982. *Biographical Memoirs of Fellows of the Royal Society*, 567-594.

Suckling, C.W. and Langley, B.W., 1990. Francis Leslie Rose. 27 June 1909-3 March 1988. *Biographical Memoirs of fellows of the Royal Society*, 36, 491-524.

Suckling, C.W., 1991. Identifying hazards in the release of genetically modified organisms. *Biotechnology Education (United Kingdom)*. **2** 51-55.

Suckling, C.W., Barlow, S.M., Bridges, J.W., Calow, P., Conning, D.M., Curnow, R.N., Dayan, A.D. and Purchase, I.F.H., 1992. Toxicity, toxicology and nutrition. *Risk: analysis, perception and management*, *The Royal Society: London*, 35-65.
